# Supplementary material
Source: Springer Nature journal article supplement (https://www.springermedizin.de/resource/supplementary/12913_2011_2044_MOESM2_ESM.pdf/9529846)

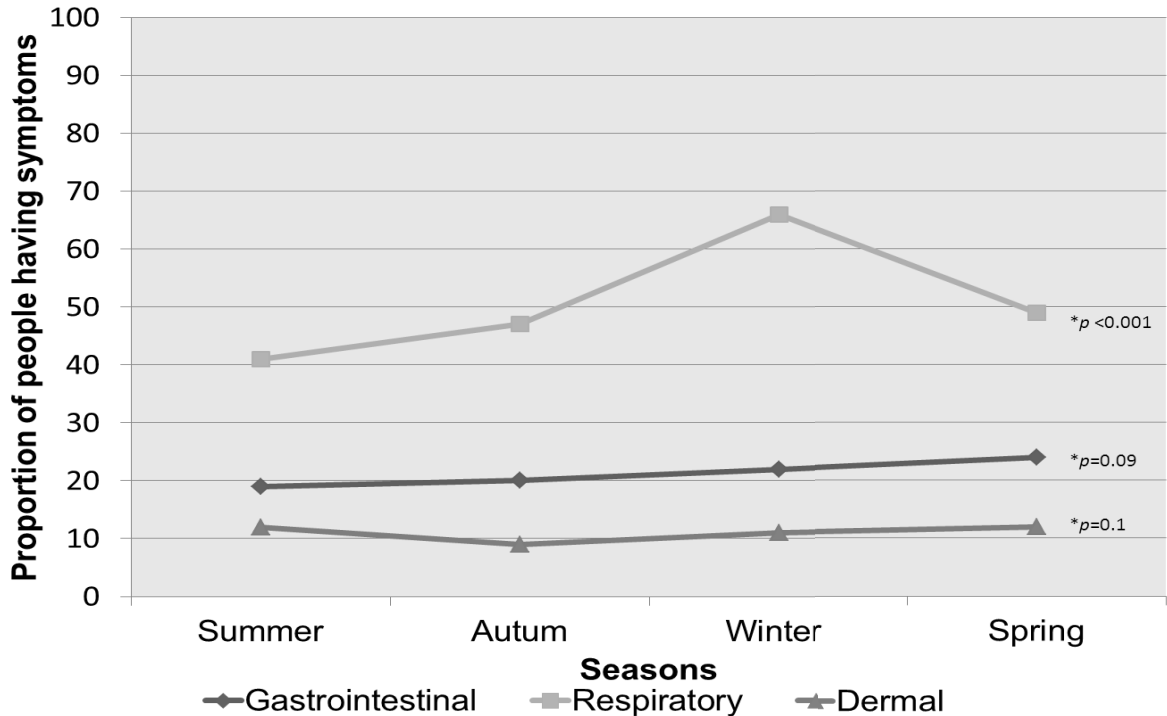

\*  $p$  value of difference of proportions of symptoms across different seasons

Supplement: MOESM2 [file 9529846]
